# Supplementary material for: Nitrogen-rich Ce–N compounds under high pressure
Source: Royal Society of Chemistry journal article supplement (doi:10.1039/d3cp04369j), 2024-01-01
Supplement: d3cp04369j1.pdf [file d3cp04369j1.pdf]

## Supporting Information

### Nitrogen-rich Ce-N compounds under high pressure

Yuan-Yuan Wang,<sup>1</sup> Shuang Liu,<sup>1</sup> Shuang-Chen Lu,<sup>2\*</sup> Yi Li,<sup>3</sup> Zhen Yao<sup>1\*</sup>

<sup>1</sup> State Key Laboratory of Superhard Materials, College of Physics, Jilin University, Changchun, 130012, P. R. China

<sup>2</sup> Department of Radiotherapy, The Second Hospital of Jilin University, No. 218 Ziqiang Street, Changchun 130041, P. R. China

<sup>3</sup> College of Science, Liaoning University of Technology, Jinzhou 121000, P. R. China

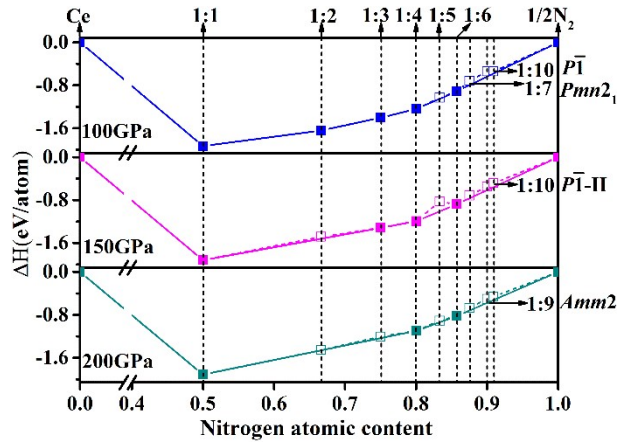

**Fig. S1.** The convex hull diagram of Ce-N system at 100, 150, 200 GPa.

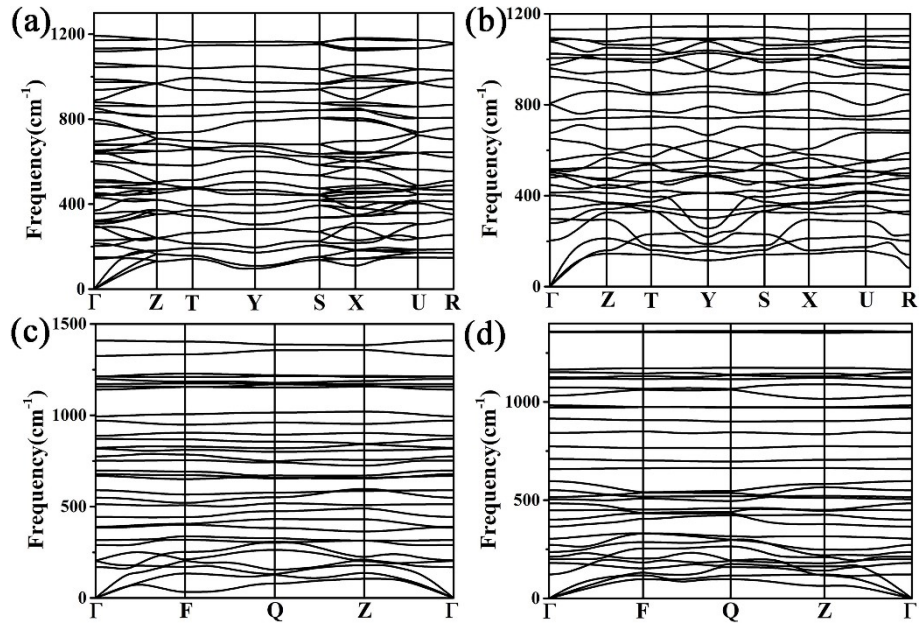

**Fig. S2.** Phonon dispersion curves for (a)  $Pmn2_1$ -CeN<sub>7</sub> at 50 GPa, (b)  $Amm2$ -CeN<sub>9</sub> at 50 GPa, (c)  $P\bar{1}$ -CeN<sub>10</sub> at 50 GPa, and (d)  $P\bar{1}$ -II-CeN<sub>10</sub> at 10 GPa.

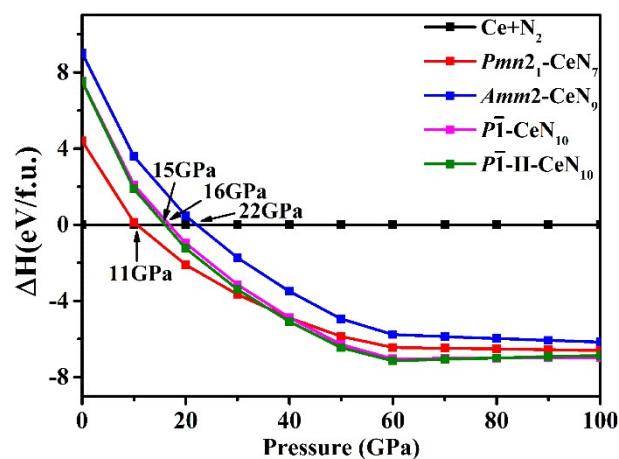

**Fig. S3.** Enthalpy-pressure diagrams of  $Pmn2_1$ -CeN<sub>7</sub>,  $Amm2$ -CeN<sub>9</sub>,  $P\bar{1}$ -CeN<sub>10</sub>, and  $P\bar{1}$ -II-CeN<sub>10</sub>.

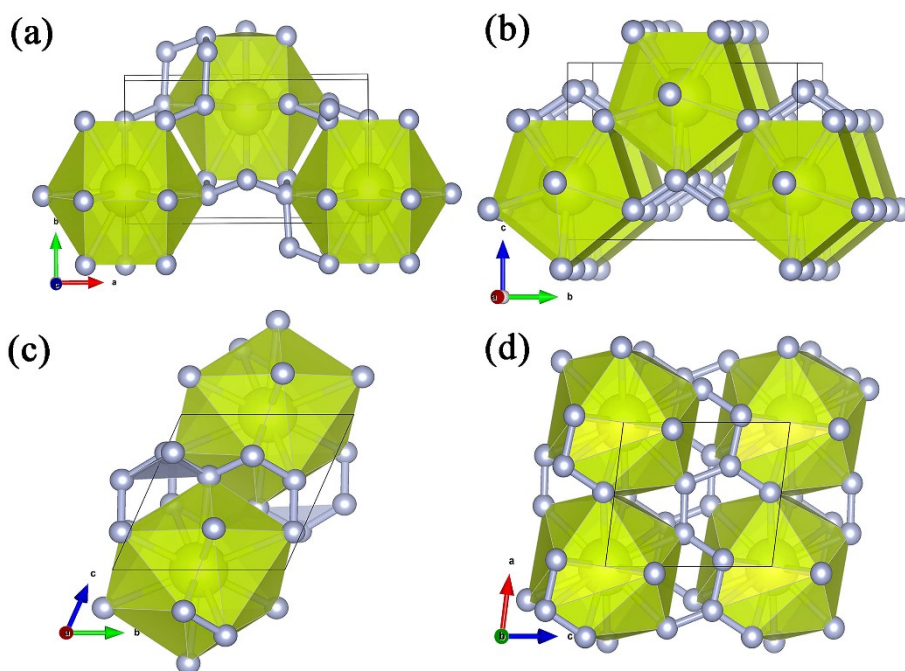

**Fig. S4.** Polyhedral structures of predicted Ce-N compounds: (a)  $C2$ -CeN<sub>7</sub>, (b)  $Amm2$ -CeN<sub>9</sub>, (c)  $P\bar{1}$ -CeN<sub>10</sub>, and (d)  $P\bar{1}$ -II-CeN<sub>10</sub>.

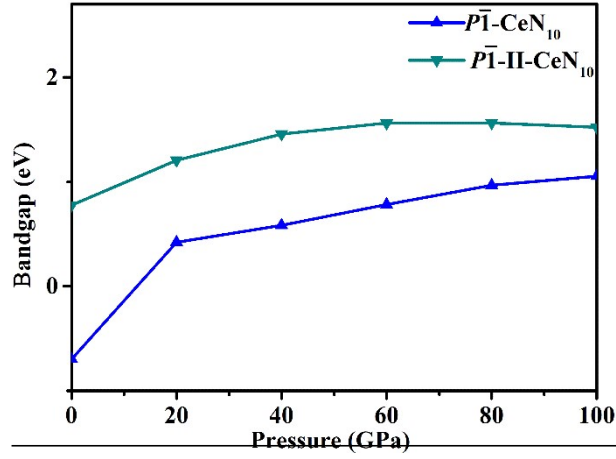

Fig. S5. Band gaps of the  $P\bar{1}$ -CeN<sub>10</sub> and  $P\bar{1}$ -II-CeN<sub>10</sub> with variable pressure.

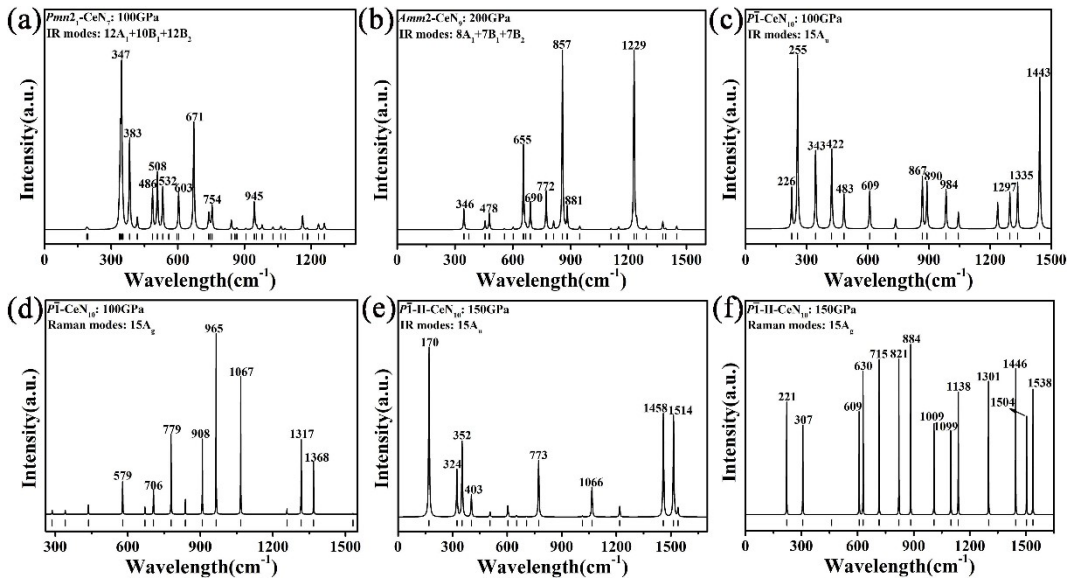

Fig. S6. (a) IR spectra of  $Pmn2_1$ -CeN<sub>7</sub>, (b) IR spectra of  $Amm2$ -CeN<sub>9</sub>, (c) and (d) IR and Raman spectra of  $P\bar{1}$ -CeN<sub>10</sub>, (e) and (f) IR and Raman spectra of  $P\bar{1}$ -II-CeN<sub>10</sub>.

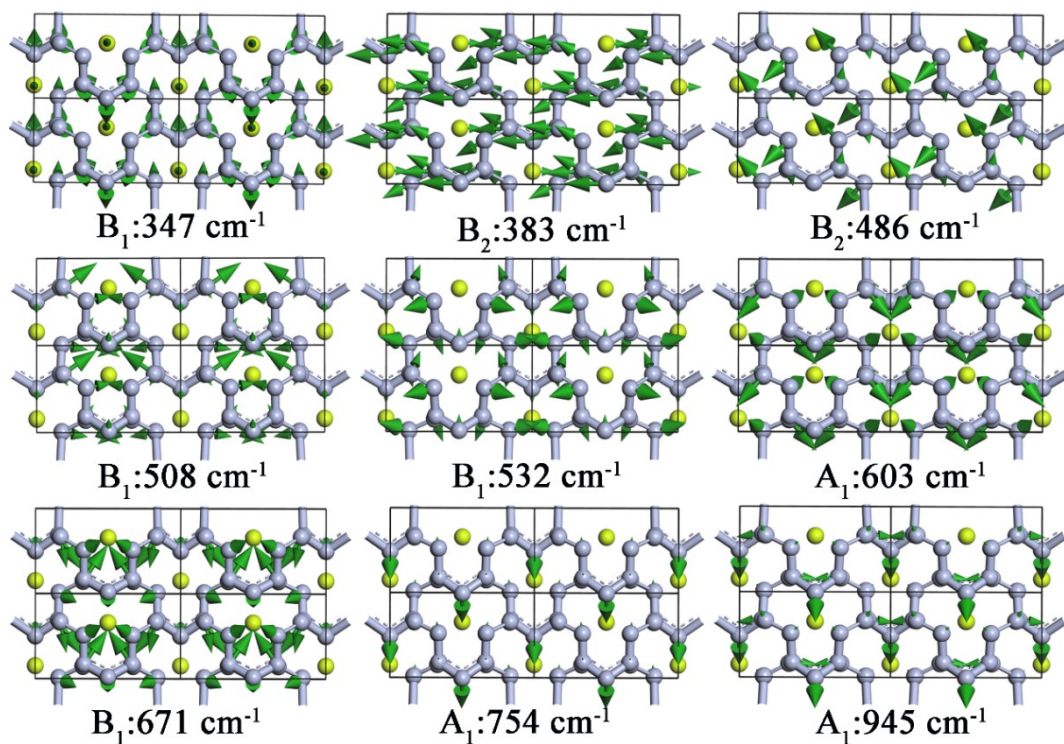

Fig. S7. IR vibrational modes of  $Pmn2_1$ -CeN<sub>7</sub> at 100 GPa.

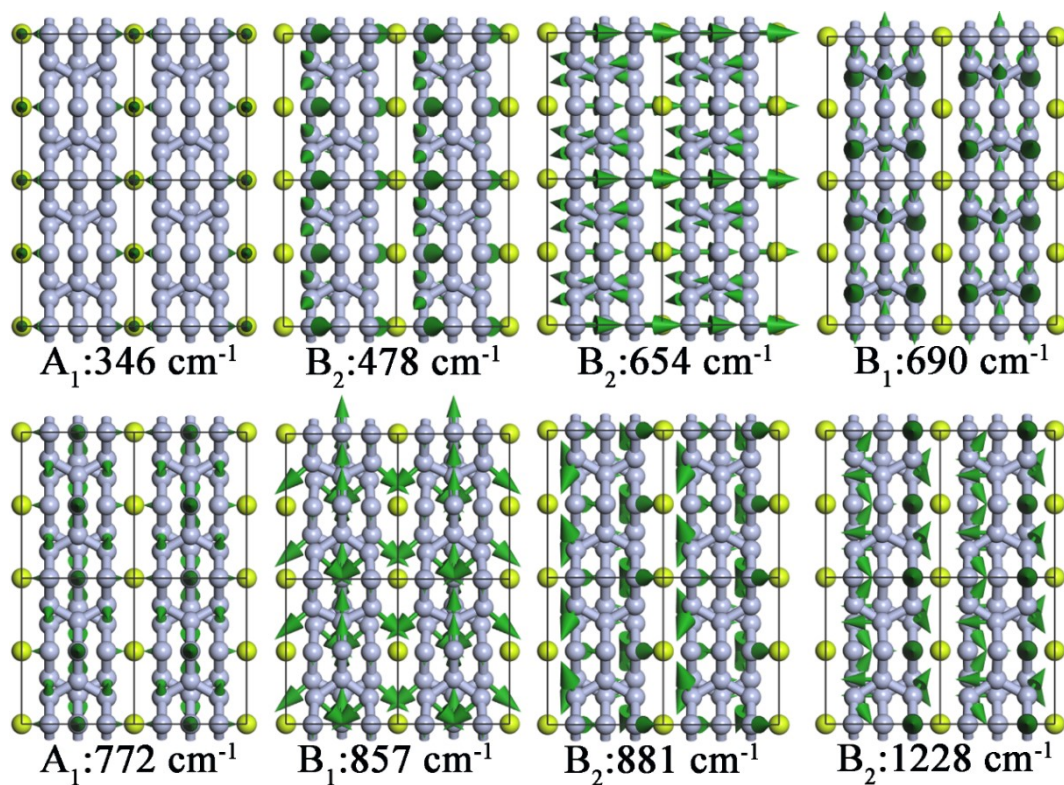

Fig. S8. IR vibrational modes of  $Amm2$ -CeN<sub>9</sub> at 200 GPa.

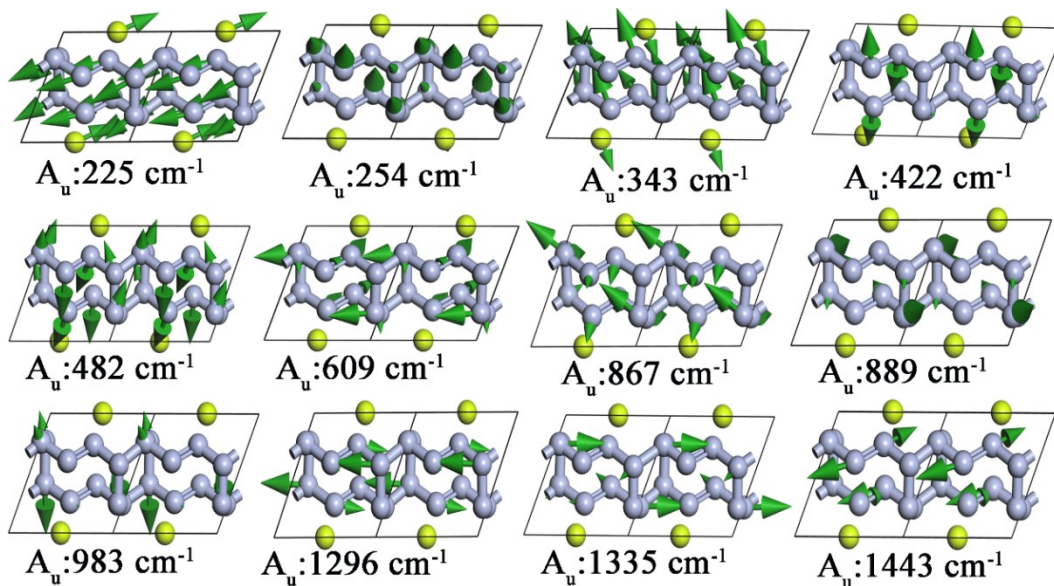

Fig. S9. IR vibrational modes of  $P\bar{1}$ -CeN<sub>10</sub> at 100 GPa.

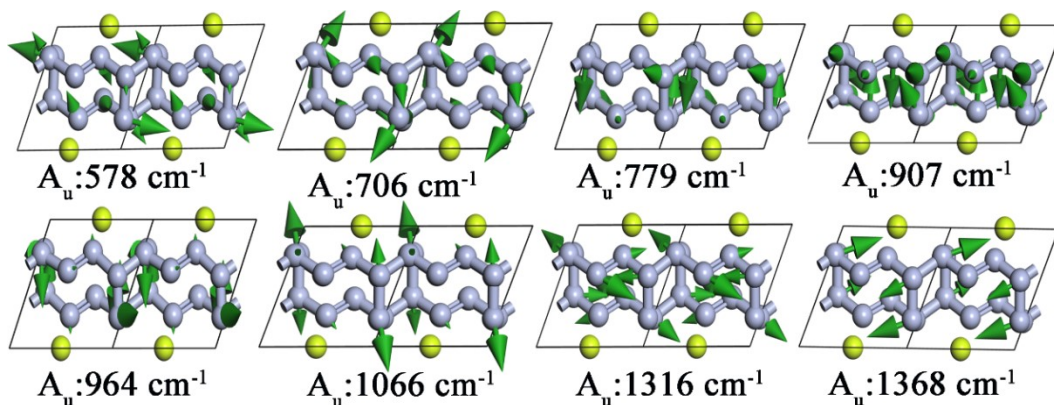

Fig. S10. Raman vibrational modes of  $P\bar{1}$ -CeN<sub>10</sub> at 100 GPa.

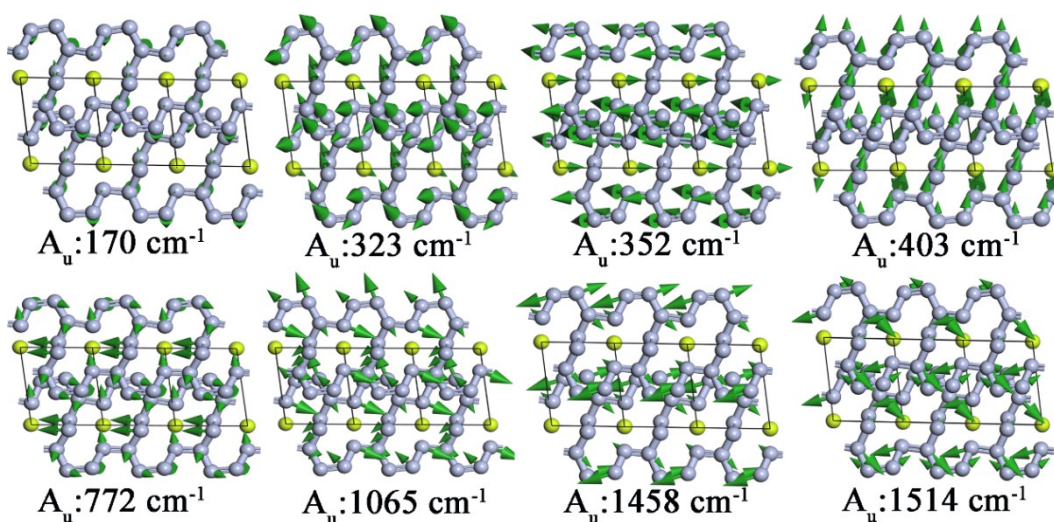

Fig. S11. IR vibrational modes of  $P\bar{1}$ -II-CeN<sub>10</sub> at 150 GPa.

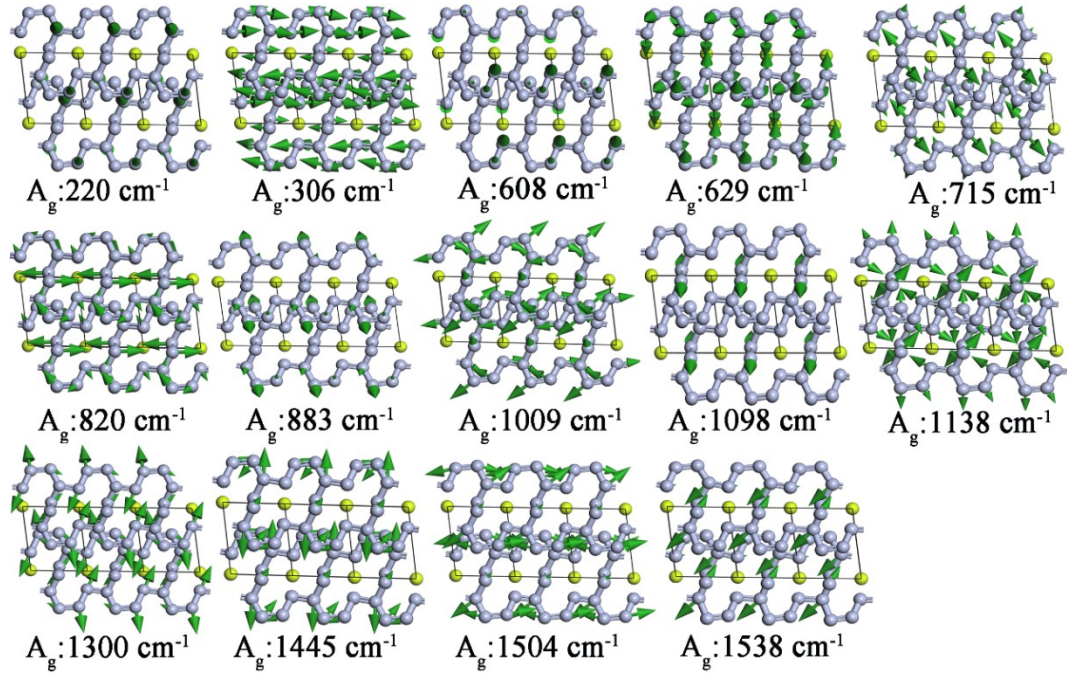

**Fig. S12.** Raman vibrational modes of  $P\bar{1}$ -II- $CeN_{10}$  at 150 GPa.

**Table S1** Elastic constants (GPa) of the four phases at predict pressures.

| phase              | $C_1$<br>1 | $C_{22}$ | $C_{33}$ | $C_{44}$ | $C_{55}$ | $C_{66}$ | $C_{12}$ | $C_{13}$ | $C_{23}$ |
|--------------------|------------|----------|----------|----------|----------|----------|----------|----------|----------|
| $Pmn2_1$ - $CeN_7$ | 660        | 806      | 778      | 154      | 249      | 219      | 229      | 347      | 169      |

| phase            | $C_{11}$ | $C_{22}$ | $C_{33}$ | $C_{44}$ | $C_{55}$ | $C_{66}$ | $C_{12}$ | $C_{13}$ | $C_{23}$ |
|------------------|----------|----------|----------|----------|----------|----------|----------|----------|----------|
| $Amm2$ - $CeN_9$ | 1247     | 1793     | 1071     | 422      | 291      | 440      | 444      | 294      | 355      |

| phase                   | $C_{11}$ | $C_{22}$ | $C_{33}$ | $C_{44}$ | $C_{55}$ | $C_{66}$ | $C_{12}$ | $C_{13}$ | $C_{15}$ | $C_{23}$ | $C_{25}$ | $C_{35}$ | $C_{46}$ |
|-------------------------|----------|----------|----------|----------|----------|----------|----------|----------|----------|----------|----------|----------|----------|
| $P\bar{1}$ - $CeN_{10}$ | 671      | 1435     | 722      | 241      | 244      | 215      | 176      | 300      | -25      | 164      | -95      | 53       | -101     |

| phase                      | $C_{11}$ | $C_{22}$ | $C_{33}$ | $C_{44}$ | $C_{55}$ | $C_{66}$ | $C_{12}$ | $C_{13}$ | $C_{15}$ | $C_{23}$ | $C_{25}$ | $C_{35}$ | $C_{46}$ |
|----------------------------|----------|----------|----------|----------|----------|----------|----------|----------|----------|----------|----------|----------|----------|
| $P\bar{1}$ -II- $CeN_{10}$ | 1177     | 913      | 1096     | 116      | 321      | 211      | 216      | 474      | -129     | 150      | -25      | -107     | -17      |

For the orthorhombic phase, the mechanical stability criteria are shown as follows:

$$C_{11} > 0; C_{44} > 0; C_{55} > 0; C_{66} > 0;$$

$$C_{11}C_{22} > C_{12}^2;$$

$$C_{11}C_{22}C_{33} + 2C_{12}C_{13}C_{23} - C_{11}C_{23}^2 - C_{22}C_{13}^2 - C_{33}C_{12}^2 > 0.$$

For the triclinic phase, the mechanical stability criteria are shown as follows:

$$\begin{aligned}
&C_{11} > 0; C_{22} > 0; C_{33} > 0; C_{44} > 0; C_{55} > 0; C_{66} > 0; \\
&[C_{11} + C_{22} + C_{33} + 2(C_{12} + C_{13} + C_{23})] > 0; \\
&(C_{33}C_{55} - C_{35}C_{35}) > 0; \\
&(C_{44}C_{66} - C_{46}C_{46}) > 0; \\
&(C_{22} + C_{33} - 2C_{23}) > 0; \\
&(C_{22}(C_{33}C_{55} - C_{35}C_{35}) + 2C_{23}C_{25}C_{35} - C_{23}C_{23}C_{55} - C_{25}C_{25}C_{33}) > 0(2(C_{15}C_{25}(C_{33}C_{12} - C_{13}C_{23}) \\
&+ C_{15}C_{35}(C_{22}C_{13} - C_{12}C_{23}) + C_{25}C_{35}(C_{11}C_{23} - C_{12}C_{13})) - (C_{15}C_{15}(C_{23}C_{33} - C_{23}C_{23}) + \\
&C_{25}C_{25}(C_{11}C_{33} - C_{13}C_{13}) + C_{35}C_{35}(C_{11}C_{22} - C_{12}C_{12})) + C_{55}g) > 0. \\
&g = C_{11}C_{22}C_{33} - C_{11}C_{23}C_{23} - C_{22}C_{13}C_{13} - C_{33}C_{12}C_{12} + 2C_{12}C_{13}C_{23}.
\end{aligned}$$

At predict pressure, the orthorhombic  $Pmn2_1$ -CeN<sub>7</sub> and  $Amm2$ -CeN<sub>9</sub>, triclinic  $P\bar{1}$ -CeN<sub>10</sub> and  $P\bar{1}$ -II-CeN<sub>10</sub> are mechanically stable due to that their elastic constants satisfy to the criteria.

**Table S2** Structural parameters (Å, °) of the four Ce-N compounds.

| Structure                        | Lattice parameters                                                           | Atomic Positions                                                                                                                                                                                   |
|----------------------------------|------------------------------------------------------------------------------|----------------------------------------------------------------------------------------------------------------------------------------------------------------------------------------------------|
| $Pmn2_1$ -CeN <sub>7</sub>       | a = 6.934, b = 3.856, c = 4.006 Å<br>α = β = γ = 90°                         | Ce1 (2a) (0.000, 0.226, -0.155)<br>N1(4b) (0.339, 0.193, -0.177)<br>N2 (4b) (0.828, 0.176, -0.652)<br>N3 (4b) (0.166, 0.716, -0.011)<br>N4 (2a) (0.500, 0.304, -0.020)                             |
| $Amm2$ -CeN <sub>9</sub>         | a = 4.455, b = 5.780, c = 4.313 Å<br>α = β = γ = 90°                         | Ce1 (2a) (0.000, 0.000, -0.670)<br>N1(4c) (0.757, 0.000, -0.162)<br>N2 (2b) (0.500, 0.000, -0.678)<br>N3 (8f) (0.749, 0.313, -0.827)<br>N4 (4e) (0.500, 0.198, -0.830)                             |
| $P\bar{1}$ -CeN <sub>10</sub>    | a = 4.169, b = 4.217, c = 4.512 Å<br>α = 67.004, β = 104.702,<br>γ = 94.408° | Ce1 (1e) (0.500, 0.500, 0.000)<br>N1(2i) (0.761, 0.824, 0.578)<br>N2 (2i) (0.917, 0.012, 0.753)<br>N3 (2i) (0.252, 0.048, 0.756)<br>N4 (2i) (0.759, 0.320, 0.602)<br>N5 (2i) (0.932, 0.519, 0.734) |
| $P\bar{1}$ -II-CeN <sub>10</sub> | a = 3.645, b = 4.090, c = 4.657 Å<br>α = 107.381, β = 82.415,<br>γ = 91.117° | Ce1 (1e) (0.000, 0.500, 0.000)<br>N1(2i) (0.300, 0.179, 0.327)<br>N2 (2i) (0.230, 0.709, 0.444)<br>N3 (2i) (0.047, 0.879, 0.701)<br>N4 (2i) (0.517, 0.826, 0.932)<br>N5 (2i) (0.578, 0.723, 0.415) |



**Table S3** Bond lengths and -ICOHP in Ce-N compounds.

| phase                                      | N-N bond | bond length | number of bonds | average bond length | -ICOHP |
|--------------------------------------------|----------|-------------|-----------------|---------------------|--------|
| <i>Pmn2</i> <sub>1</sub> -CeN <sub>7</sub> | N1-N2    | 1.43        | 4               | 1.37                | 12.80  |
|                                            | N1-N4    | 1.35        | 4               |                     |        |
|                                            | N2-N3    | 1.32        | 4               |                     |        |
|                                            | N1-N3    | 1.38        | 4               |                     |        |
| <i>Amm2</i> -CeN <sub>9</sub>              | N1-N1    | 1.29        | 4               | 1.30                | 14.56  |
|                                            | N1-N3    | 1.29        | 4               |                     |        |
|                                            | N1-N4    | 1.30        | 4               |                     |        |
|                                            | N2-N4    | 1.32        | 4               |                     |        |
|                                            | N3-N4    | 1.30        | 4               |                     |        |
| <i>P</i> $\bar{1}$ -CeN <sub>10</sub>      | N1-N3    | 1.37        | 2               | 1.35                | 12.93  |
|                                            | N2-N3    | 1.39        | 2               |                     |        |
|                                            | N1-N2    | 1.35        | 2               |                     |        |
|                                            | N1-N5    | 1.35        | 2               |                     |        |
|                                            | N2-N4    | 1.34        | 2               |                     |        |
|                                            | N4-N5    | 1.29        | 2               |                     |        |
| <i>P</i> $\bar{1}$ -II-CeN <sub>10</sub>   | N1-N3    | 1.30        | 2               | 1.29                | 14.96  |
|                                            | N3-N2    | 1.29        | 2               |                     |        |
|                                            | N2-N5    | 1.26        | 2               |                     |        |
|                                            | N5-N1    | 1.29        | 2               |                     |        |
|                                            | N1-N4    | 1.29        | 2               |                     |        |
|                                            | N4-N4    | 1.38        | 1               |                     |        |

**Table S4** Elastic constants (GPa) of the four phases at ambient pressure.

| phase                                      | C <sub>11</sub> | C <sub>22</sub> | C <sub>33</sub> | C <sub>44</sub> | C <sub>55</sub> | C <sub>66</sub> | C <sub>12</sub> | C <sub>13</sub> | C <sub>23</sub> |
|--------------------------------------------|-----------------|-----------------|-----------------|-----------------|-----------------|-----------------|-----------------|-----------------|-----------------|
| <i>Pmn2</i> <sub>1</sub> -CeN <sub>7</sub> | 162             | 254             | 256             | 27              | 61              | 59              | 62              | 75              | 69              |

| phase                         | C <sub>11</sub> | C <sub>22</sub> | C <sub>33</sub> | C <sub>44</sub> | C <sub>55</sub> | C <sub>66</sub> | C <sub>12</sub> | C <sub>13</sub> | C <sub>23</sub> |
|-------------------------------|-----------------|-----------------|-----------------|-----------------|-----------------|-----------------|-----------------|-----------------|-----------------|
| <i>Amm2</i> -CeN <sub>9</sub> | 370             | 689             | 149             | 148             | 51              | 165             | 95              | 57              | 74              |

| phase                                     | C <sub>11</sub> | C <sub>22</sub> | C <sub>33</sub> | C <sub>44</sub> | C <sub>55</sub> | C <sub>66</sub> | C <sub>12</sub> | C <sub>13</sub> | C <sub>15</sub> | C <sub>23</sub> | C <sub>25</sub> | C <sub>35</sub> | C <sub>46</sub> |
|-------------------------------------------|-----------------|-----------------|-----------------|-----------------|-----------------|-----------------|-----------------|-----------------|-----------------|-----------------|-----------------|-----------------|-----------------|
| <i>P</i> $\bar{1}$ -<br>CeN <sub>10</sub> | 811             | 210             | 194             | 54              | 61              | 57              | 49              | 51              | -41             | 48              | 2               | 19              | -7              |

| phase                   | C <sub>11</sub> | C <sub>22</sub> | C <sub>33</sub> | C <sub>44</sub> | C <sub>55</sub> | C <sub>66</sub> | C <sub>12</sub> | C <sub>13</sub> | C <sub>15</sub> | C <sub>23</sub> | C <sub>25</sub> | C <sub>35</sub> | C <sub>46</sub> |
|-------------------------|-----------------|-----------------|-----------------|-----------------|-----------------|-----------------|-----------------|-----------------|-----------------|-----------------|-----------------|-----------------|-----------------|
| <i>P</i> $\bar{1}$ -II- | 467             | 135             | 309             | 38              | 88              | 27              | 2               | 61              | -7.8            | 28              | -6              | -19             | -5              |

|                   |  |  |  |  |  |  |  |  |  |  |  |  |  |
|-------------------|--|--|--|--|--|--|--|--|--|--|--|--|--|
| CeN <sub>10</sub> |  |  |  |  |  |  |  |  |  |  |  |  |  |
|-------------------|--|--|--|--|--|--|--|--|--|--|--|--|--|

At ambient pressure, the criteria of mechanical stability are the same as above. The orthorhombic  $Pmn2_1$ -CeN<sub>7</sub> and  $Amm2$ -CeN<sub>9</sub>, triclinic  $P\bar{1}$ -CeN<sub>10</sub> and  $P\bar{1}$ -II-CeN<sub>10</sub> are mechanically stable due to that their elastic constants satisfy to the criteria.
